# Supplementary material for: A novel Plasmodium falciparum rhoptry associated adhesin mediates erythrocyte invasion through the sialic-acid dependent pathway
Source: PubMed Central journal article supplement (PMC4935899; doi:10.1038/srep29185), 2016-07-07
Supplement: srep29185-s1.pdf [file srep29185-s1.pdf]

## Supplementary Information

### **A novel *Plasmodium falciparum* rhoptry associated adhesin mediates erythrocyte invasion through the sialic-acid dependent pathway**

Gaurav Anand<sup>1</sup>, K. Sony Reddy<sup>1</sup>, Alok Kumar Pandey<sup>1</sup>, Syed Yusuf Mian<sup>2</sup>, Hina Singh<sup>1</sup>, Shivani Arora Mittal<sup>1</sup>, Emmanuel Amlabu<sup>1</sup>, Quique Bassat<sup>3,4</sup>, Alfredo Mayor<sup>3,4</sup>, Virander Singh Chauhan<sup>1</sup>, Deepak Gaur<sup>2\*</sup>

<sup>1</sup>Malaria Group, International Centre for Genetic Engineering and Biotechnology (ICGEB), New Delhi, India.

<sup>2</sup>Laboratory of Malaria and Vaccine Research, School of Biotechnology, Jawaharlal Nehru University, New Delhi, India

<sup>3</sup>ISGlobal, Barcelona Ctr. Int. Health Res. (CRESIB), Hospital Clínic - Universitat de Barcelona, Barcelona, Spain

<sup>4</sup>Centro de Investigação em Saude de Manhica (CISM), Maputo, Mozambique.

\*Corresponding Author

Address correspondence to:

Deepak Gaur, Ph.D.  
Laboratory of Malaria & Vaccine Research  
School of Biotechnology  
Jawaharlal Nehru University  
New Delhi 110067 India  
Tel: +91-9818807105  
Fax: +91-11-26742040  
E-mail: [deepakgaur189@gmail.com](mailto:deepakgaur189@gmail.com)

## Supplementary Methods

### Mass Spectrometric analysis of purified recombinant protein

In-gel digestion of the purified recombinant protein band was done to ascertain its identity. The corresponding protein bands from the coomassie stained SDS-PAGE gel were excised, reduced, and alkylated. Proteins were digested overnight with trypsin (Promega) and the corresponding peptides were eluted from the gel using trifluoroacetic acid. Mass spectrometry analysis and protein identification was done as described previously<sup>1</sup>

### ELISA

Antibody responses in mice and rabbit were quantified by ELISA. Briefly, 96-well plates (Costar) were coated overnight with 0.2 µg per well of the recombinant protein in 0.06 M carbonate-bicarbonate buffer, pH 9.6 (Sigma). The plates were washed thrice with 0.05% Tween in PBS and further blocked with 2% skimmed milk in phosphate buffered saline (PBS) at 37°C for 2 h. Washing was sequentially repeated and serial dilutions of the primary sera (1:1,000-fold onwards) were prepared and incubated in the respective wells for 1 hour. The ELISA plate was subjected to stringent washing with PBS containing 0.05% Tween-20 and finally with PBS alone. Thereafter, a 1:10,000 dilution of the horseradish peroxidase conjugated secondary antibody (Sigma, St. Louis, MO) was added to each well and incubated for 60 minutes at 37°C. The enzymatic reaction was developed by the addition of *o*-phenylenediamine dihydrochloride (OPD) and hydrogen peroxide for 25 minutes at 37°C. The reaction was terminated by the addition of 2M sulphuric acid, and OD<sub>492</sub> was recorded by using an ELISA microplate reader (Molecular Devices). Pre-immune (pre-bleed; PI) sera were used at similar dilutions as a control.

### **FACS-based erythrocyte binding assay (EBA)**

Erythrocytes were incubated with 0.5 ml of culture supernatant at 37°C for 3 hours. After incubation, the erythrocytes were washed with PBS and bound PfRA on surface of erythrocytes was detected using anti-PfRA rabbit sera and Alexa 488 conjugated goat anti-rabbit IgG antibodies and were read on a FACS Caliber flow cytometer. The resulting flow cytometry data were analyzed using Cell Quest software.

### **Co-Immunoprecipitation and Mass Spectrometric Analysis**

Immunoprecipitation experiments using lysate of the schizont stage parasites were performed as prescribed (Thermo scientific). The trypsin digested samples were analyzed on a nano-LC equipped Orbitrap VELOS PRO (Thermo Fisher Scientific) mass spectrometer as described previously<sup>1</sup>. The proteins were identified by blasting the peptides over a *Plasmodium falciparum* database (Uniprot), using proteome discoverer (Thermofisher) using standardized procedure as described earlier<sup>1</sup>.

### **Invasion assays**

Invasion assays were done as described previously<sup>2</sup>. Briefly, the parasites were first synchronized by the purification of schizont-stage (40-42 h) parasites on a percoll gradient. 0.4 million schizont stage percoll gradient purified parasites were incubated with 20 million uninfected normal as well as enzymatically treated erythrocytes at 2% haematocrit. After about 40 h post invasion, the parasite infected erythrocytes were stained with ethidium bromide dye and measured by a fluorescence activated cell sorter (FACS)-based assay. Relative invasion in enzyme treated erythrocytes was calculated with respect to the invasion observed in untreated erythrocytes. Two different experiments were performed in triplicate. For each assay Dd2 was

used as control for neuraminidase treated erythrocytes<sup>2</sup>. The error bars represent the standard error of the mean.

### Sequence polymorphism analysis

To check sequence polymorphisms in the PfRA gene, available nucleotide sequences for the *P. falciparum* laboratory clones and field isolates was retrieved from the Plasmodb database, translated using ExPASy translate tool and aligned using multiple sequence alignment program Clustal Omega.

### References

1. Reddy, K. S. *et al.* Multiprotein complex between the GPIanchored CyRPA with PfRH5 and PfRipr is crucial for *Plasmodium falciparum* erythrocyte invasion. *Proc. Natl. Acad. Sci. U.S.A.* **112**, 1179–1184 (2015).
2. Gaur, D., Storry, J.R., Reid, M.E., Barnwell, J.W., Miller, L.H. *Plasmodium falciparum* Is Able To Invade Erythrocytes through a Trypsin-Resistant Pathway Independent of Glycophorin B. *Infect Immun.* **71**, 6742-6746 (2003).

**Supplementary Figure S1: Alignment of PfRA protein sequences from 9 *P. falciparum* laboratory strains (Clustal omega).**

```

1                                     60
3D7  MKRFFVLFVIFLVHIWSENVDTFKCNYSKKKKNGHHIKR HITNDEEKKKEYSFLMLGKEN
Dd2-1 MKRFFVLFVIFLVHIWSENVDTFKCNYSKKKKNGHHIKR HITNDEEKKKEYSFLMLGKEN
T9_94 MKRFFVLFVIFLVHIWSENVDTFKCNYSKKKKNGHHIKR HITNDEEKKKEYSFLMLGKEN
Dd2-2 MKRFFVLFVIFLVHIWSENVDTFKCNYSKKKKNGHHIKR HITNDEEKKKEYSFLMLGKEN
7G8  MKRFFVLFVIFLVHIWSENVDTFKCNYSKKKKNGHHIKR HITNDEEKKKEYSFLMLGKEN
IT   MKRFFVLFVIFLVHIWSENVDTFKCNYSKKKKNGHHIKR HITNDEEKKKEYSFLMLGKEN
707A MKRFFVLFVIFLVHIWSENVDTFKCNYSKKKKNGHHIKR HITNDEEKKKEYSFLMLGKEN
HB3  MKRFFVLFVIFLVHIWSENVDTFKCNYSKKKKNGHHIKR HITNDEEKKKEYSFLMLGKEN
CS2  MKRFFVLFVIFLVHIWSENVDTFKCNYSKKKKNGHHIKR HITNDEEKKKEYSFLMLGKEN
*****

61                                     120
3D7  EEENKKNENNQNVNKDNDNNDNNNEKKNEEQNHNEKKQEEVINNNNNNVENKKEEENHN
Dd2-1 EEENKKNENNQNVNKDNDNNDNNNEKKNEEQNHNEKKQEEVINNNNNNVENKKEEENHN
T9_94 EEENKKNENNQNVNKDNDNNDNNNEKKNEEQNHNEKKQEEVINNNNNNVENKKEEENHN
Dd2-2 EEENKKNENNQNVNKDNDNNDNNNEKKNEEQNHNEKKQEEVINNNNNNVENKKEEENHN
7G8  EEENKKNENNQNVNKDNDNNDNNNEKKNEEQNHNEKKQEEVINNNNNNVENKKEEENHN
IT   EEENKKNENNQNVNKDNDNNDNNNEKKNEEQNHNEKKQEEVINNNNNNVENKKEEENHN
707A EEENKKNENNQNVNKDNDNNDNNNEKKNEEQNHNEKKQEEVINNNNNNVENKKEEENHN
HB3  EEENKKNENNQNVNKDNDNNDNNNEKKNEEQNHNEKKQEEVINNNNNNVENKKEEENHN
CS2  EEENKKNENNQNVNKDNDNNDNNNEKKNEEQNHNEKKQEEVINNNNNNVENKKEEENHN
*****

121                                    180
3D7  NDKKTDEQNHVNEKKQEGENNKHKKDDTIPPEKKINKENLLEYGTHDKEGHFIPSYKTLT
Dd2-1 NDKKTDEQNHVNEKKQEGENNKHKKDDTIPPEKKINKENLLEYGTHDKEGHFIPSYKTLT
T9_94 NDKKTDEQNHVNEKKQEGENNKHKKDDTIPPEKKINKENLLEYGTHDKEGHFIPSYKTLT
Dd2-2 NDKKTDEQNHVNEKKQEGENNKHKKDDTIPPEKKINKENLLEYGTHDKEGHFIPSYKTLT
7G8  NDKKTDEQNHVNEKKQEGENNKHKKDDTIPPEKKINKENLLEYGTHDKEGHFIPSYKTLT
IT   NDKKTDEQNHVNEKKQEGENNKHKKDDTIPPEKKINKENLLEYGTHDKEGHFIPSYKTLT
707A NDKKTDEQNHVNEKKQEGENNKHKKDDTIPPEKKINKENLLEYGTHDKEGHFIPSYKTLT
HB3  NDKKTDEQNHVNEKKQEGENNKHKKDDTIPPEKKINKENLLEYGTHDKEGHFIPSYKTLT
CS2  NDKKTDEQNHVNEKKQEGENNKHKKDDTIPPEKKINKENLLEYGTHDKEGHFIPSYKTLT
*****

181                                    240
3D7  DEILSTNNAMEKASSFLKIACSHVMKLI EFIPESKLSSQYIKVDNKNIY LKDIAVECQNI
Dd2-1 DEILSTNNAMEKASSFLKIACSHVMKLI EFIPESKLSSQYIKVDNKNIY LKDIAVECQNI
T9_94 DEILSTNNAMEKASSFLKIACSHVMKLI EFIPESKLSSQYIKVDNKNIY LKDIAVECQNI
Dd2-2 DEILSTNNAMEKASSFLKIACSHVMKLI EFIPESKLSSQYIKVDNKNIY LKDIAVECQNI
7G8  DEILSTNNAMEKASSFLKIACSHVMKLI EFIPESKLSSQYIKVDNKNIY LKDIAVECQNI
IT   DEILSTNNAMEKASSFLKIACSHVMKLI EFIPESKLSSQYIKVDNKNIY LKDIAVECQNI
707A DEILSTNNAMEKASSFLKIACSHVMKLI EFIPESKLSSQYIKVDNKNIY LKDIAVECQNI
HB3  DEILSTNNAMEKASSFLKIACSHVMKLI EFIPESKLSSQYIKVDNKNIY LKDIAVECQNI
CS2  DEILSTNNAMEKASSFLKIACSHVMKLI EFIPESKLSSQYIKVDNKNIY LKDIAVECQNI
*****

241                                    267
3D7  YFNLEKFSMTLIVFNSKINKFIYSQEK
Dd2-1 YFNLEKFSMTLIVFNSKINKFIYSQEK
T9_94 YFNLEKFSMTLIVFNSKINKFIYSQEK
Dd2-2 YFNLEKFSMTLIVFNSKINKFIYSQEK
7G8  YFNLEKFSMTLIVFNSKINKFIYSQEK
IT   YFNLEKFSMTLIVFNSKINKFIYSQEK
707A YFNLEKFSMTLIVFNSKINKFIYSQEK
HB3  YFNLEKFSMTLIVFNSKINKFIYSQEK
CS2  YFNLEKFSMTLIVFNSKINKFIYSQEK
*****

```

**Supplementary Figure S2: Alignment of PfRA protein sequences from 57 *P. falciparum* field isolates (Clustal omega).**

```

1                                                                 60
3D7      MKRFFVLFVIFLVHIWSENVDTFKCNYSKKKKNGHHIKRHITNDEEKKKEYSFLMLGKEN
TRIPS_480 MKRFFVLFVIFLVHIWSENVDTFKCNYSKKKKNGHHIKRHITNDEEKKKEYSFLMLGKEN
RV_3703  MKRFFVLFVIFLVHIWSENVDTFKCNYSKKKKNGHHIKRHITNDEEKKKEYSFLMLGKEN
RV_3637  MKRFFVLFVIFLVHIWSENVDTFKCNYSKKKKNGHHIKRHITNDEEKKKEYSFLMLGKEN
RV_3729  MKRFFVLFVIFLVHIWSENVDTFKCNYSKKKKNGHHIKRHITNDEEKKKEYSFLMLGKEN
RV_3708  MKRFFVLFVIFLVHIWSENVDTFKCNYSKKKKNGHHIKRHITNDEEKKKEYSFLMLGKEN
UGK_408.2 MKRFFVLFVIFLVHIWSENVDTFKCNYSKKKKNGHHIKRHITNDEEKKKEYSFLMLGKEN
309.1    MKRFFVLFVIFLVHIWSENVDTFKCNYSKKKKNGHHIKRHITNDEEKKKEYSFLMLGKEN
UGK_443.2 MKRFFVLFVIFLVHIWSENVDTFKCNYSKKKKNGHHIKRHITNDEEKKKEYSFLMLGKEN
RV_3736  MKRFFVLFVIFLVHIWSENVDTFKCNYSKKKKNGHHIKRHITNDEEKKKEYSFLMLGKEN
PS122_G11 MKRFFVLFVIFLVHIWSENVDTFKCNYSKKKKNGHHIKRHITNDEEKKKEYSFLMLGKEN
RV_3687  MKRFFVLFVIFLVHIWSENVDTFKCNYSKKKKNGHHIKRHITNDEEKKKEYSFLMLGKEN
RV_3610  MKRFFVLFVIFLVHIWSENVDTFKCNYSKKKKNGHHIKRHITNDEEKKKEYSFLMLGKEN
PS250    MKRFFVLFVIFLVHIWSENVDTFKCNYSKKKKNGHHIKRHITNDEEKKKEYSFLMLGKEN
RV_3675  MKRFFVLFVIFLVHIWSENVDTFKCNYSKKKKNGHHIKRHITNDEEKKKEYSFLMLGKEN
RV_3606  MKRFFVLFVIFLVHIWSENVDTFKCNYSKKKKNGHHIKRHITNDEEKKKEYSFLMLGKEN
PS103    MKRFFVLFVIFLVHIWSENVDTFKCNYSKKKKNGHHIKRHITNDEEKKKEYSFLMLGKEN
RV_3741  MKRFFVLFVIFLVHIWSENVDTFKCNYSKKKKNGHHIKRHITNDEEKKKEYSFLMLGKEN
TRIPS_437 MKRFFVLFVIFLVHIWSENVDTFKCNYSKKKKNGHHIKRHITNDEEKKKEYSFLMLGKEN
TRIPS_474 MKRFFVLFVIFLVHIWSENVDTFKCNYSKKKKNGHHIKRHITNDEEKKKEYSFLMLGKEN
RV_3701  MKRFFVLFVIFLVHIWSENVDTFKCNYSKKKKNGHHIKRHITNDEEKKKEYSFLMLGKEN
PS183    MKRFFVLFVIFLVHIWSENVDTFKCNYSKKKKNGHHIKRHITNDEEKKKEYSFLMLGKEN
RV_3731  MKRFFVLFVIFLVHIWSENVDTFKCNYSKKKKNGHHIKRHITNDEEKKKEYSFLMLGKEN
TRIPS_364 MKRFFVLFVIFLVHIWSENVDTFKCNYSKKKKNGHHIKRHITNDEEKKKEYSFLMLGKEN
BM_0009  MKRFFVLFVIFLVHIWSENVDTFKCNYSKKKKNGHHIKRHITNDEEKKKEYSFLMLGKEN
TRIPS_331 MKRFFVLFVIFLVHIWSENVDTFKCNYSKKKKNGHHIKRHITNDEEKKKEYSFLMLGKEN
RV_3766  MKRFFVLFVIFLVHIWSENVDTFKCNYSKKKKNGHHIKRHITNDEEKKKEYSFLMLGKEN
TRIPS_355 MKRFFVLFVIFLVHIWSENVDTFKCNYSKKKKNGHHIKRHITNDEEKKKEYSFLMLGKEN
TRIPS_461 MKRFFVLFVIFLVHIWSENVDTFKCNYSKKKKNGHHIKRHITNDEEKKKEYSFLMLGKEN
TRIPS_501 MKRFFVLFVIFLVHIWSENVDTFKCNYSKKKKNGHHIKRHITNDEEKKKEYSFLMLGKEN
O079-B   MKRFFVLFVIFLVHIWSENVDTFKCNYSKKKKNGHHIKRHITNDEEKKKEYSFLMLGKEN
H209     MKRFFVLFVIFLVHIWSENVDTFKCNYSKKKKNGHHIKRHITNDEEKKKEYSFLMLGKEN
P196J3-C MKRFFVLFVIFLVHIWSENVDTFKCNYSKKKKNGHHIKRHITNDEEKKKEYSFLMLGKEN
SenT101.09 MKRFFVLFVIFLVHIWSENVDTFKCNYSKKKKNGHHIKRHITNDEEKKKEYSFLMLGKEN
SenT149.09 MKRFFVLFVIFLVHIWSENVDTFKCNYSKKKKNGHHIKRHITNDEEKKKEYSFLMLGKEN
SenT180.08 MKRFFVLFVIFLVHIWSENVDTFKCNYSKKKKNGHHIKRHITNDEEKKKEYSFLMLGKEN
SenT142.09 MKRFFVLFVIFLVHIWSENVDTFKCNYSKKKKNGHHIKRHITNDEEKKKEYSFLMLGKEN
N011-A    MKRFFVLFVIFLVHIWSENVDTFKCNYSKKKKNGHHIKRHITNDEEKKKEYSFLMLGKEN
O306-A    MKRFFVLFVIFLVHIWSENVDTFKCNYSKKKKNGHHIKRHITNDEEKKKEYSFLMLGKEN
P241-D    MKRFFVLFVIFLVHIWSENVDTFKCNYSKKKKNGHHIKRHITNDEEKKKEYSFLMLGKEN
RV_3635   MKRFFVLFVIFLVHIWSENVDTFKCNYSKKKKNGHHIKRHITNDEEKKKEYSFLMLGKEN
P164-C    MKRFFVLFVIFLVHIWSENVDTFKCNYSKKKKNGHHIKRHITNDEEKKKEYSFLMLGKEN
RV_3630   MKRFFVLFVIFLVHIWSENVDTFKCNYSKKKKNGHHIKRHITNDEEKKKEYSFLMLGKEN
RV_3739   MKRFFVLFVIFLVHIWSENVDTFKCNYSKKKKNGHHIKRHITNDEEKKKEYSFLMLGKEN
RV_3730   MKRFFVLFVIFLVHIWSENVDTFKCNYSKKKKNGHHIKRHITNDEEKKKEYSFLMLGKEN
BM_0008   MKRFFVLFVIFLVHIWSENVDTFKCNYSKKKKNGHHIKRHITNDEEKKKEYSFLMLGKEN
TRIPS_759 MKRFFVLFVIFLVHIWSENVDTFKCNYSKKKKNGHHIKRHITNDEEKKKEYSFLMLGKEN
RV_3735   MKRFFVLFVIFLVHIWSENVDTFKCNYSKKKKNGHHIKRHITNDEEKKKEYSFLMLGKEN
TRIPS_440 MKRFFVLFVIFLVHIWSENVDTFKCNYSKKKKNGHHIKRHITNDEEKKKEYSFLMLGKEN
RV_3721   MKRFFVLFVIFLVHIWSENVDTFKCNYSKKKKNGHHIKRHITNDEEKKKEYSFLMLGKEN
P237-C    MKRFFVLFVIFLVHIWSENVDTFKCNYSKKKKNGHHIKRHITNDEEKKKEYSFLMLGKEN
TRIPS_487 MKRFFVLFVIFLVHIWSENVDTFKCNYSKKKKNGHHIKRHITNDEEKKKEYSFLMLGKEN
M113-A    MKRFFVLFVIFLVHIWSENVDTFKCNYSKKKKNGHHIKRHITNDEEKKKEYSFLMLGKEN
RV_3714   MKRFFVLFVIFLVHIWSENVDTFKCNYSKKKKNGHHIKRHITNDEEKKKEYSFLMLGKEN
RV_3717   MKRFFVLFVIFLVHIWSENVDTFKCNYSKKKKNGHHIKRHITNDEEKKKEYSFLMLGKEN
327.1     MKRFFVLFVIFLVHIWSENVDTFKCNYSKKKKNGHHIKRHITNDEEKKKEYSFLMLGKEN
RV_3655   MKRFFVLFVIFLVHIWSENVDTFKCNYSKKKKNGHHIKRHITNDEEKKKEYSFLMLGKEN
*****

```



121

180

3D7 NDKKTDEQNHVNEKKEGEGENNKHKKDDTIPPEKKINKENLLEYGTHDKEGHFIPSYKTLT  
TRIPS\_480 NDKKTDEQNHVNEKKEGEGENNKHKKDDTIPPEKKINKENLLEYGTHDKEGHFIPSYKTLT  
RV\_3703 NDKKTDEQNHVNEKKEGEGENNKHKKDDTIPPEKKINKENLLEYGTHDKEGHFIPSYKTLT  
RV\_3637 NDKKTDEQNHVNEKKEGEGENNKHKKDDTIPPEKKINKENLLEYGTHDKEGHFIPSYKTLT  
RV\_3729 NDKKTDEQNHVNEKKEGEGENNKHKKDDTIPPEKKINKENLLEYGTHDKEGHFIPSYKTLT  
RV\_3708 NDKKTDEQNHVNEKKEGEGENNKHKKDDTIPPEKKINKENLLEYGTHDKEGHFIPSYKTLT  
UGK\_408.2 NDKKTDEQNHVNEKKEGEGENNKHKKDDTIPPEKKINKENLLEYGTHDKEGHFIPSYKTLT  
309.1 NDKKTDEQNHVNEKKEGEGENNKHKKDDTIPPEKKINKENLLEYGTHDKEGHFIPSYKTLT  
UGK\_443.2 NDKKTDEQNHVNEKKEGEGENNKHKKDDTIPPEKKINKENLLEYGTHDKEGHFIPSYKTLT  
RV\_3736 NDKKTDEQNHVNEKKEGEGENNKHKKDDTIPPEKKINKENLLEYGTHDKEGHFIPSYKTLT  
PS122\_G11 NDKKTDEQNHVNEKKEGEGENNKHKKDDTIPPEKKINKENLLEYGTHDKEGHFIPSYKTLT  
RV\_3687 NDKKTDEQNHVNEKKEGEGENNKHKKDDTIPPEKKINKENLLEYGTHDKEGHFIPSYKTLT  
RV\_3610 NDKKTDEQNHVNEKKEGEGENNKHKKDDTIPPEKKINKENLLEYGTHDKEGHFIPSYKTLT  
PS250 NDKKTDEQNHVNEKKEGEGENNKHKKDDTIPPEKKINKENLLEYGTHDKEGHFIPSYKTLT  
RV\_3675 NDKKTDEQNHVNEKKEGEGENNKHKKDDTIPPEKKINKENLLEYGTHDKEGHFIPSYKTLT  
RV\_3606 NDKKTDEQNHVNEKKEGEGENNKHKKDDTIPPEKKINKENLLEYGTHDKEGHFIPSYKTLT  
PS103 NDKKTDEQNHVNEKKEGEGENNKHKKDDTIPPEKKINKENLLEYGTHDKEGHFIPSYKTLT  
RV\_3741 NDKKTDEQNHVNEKKEGEGENNKHKKDDTIPPEKKINKENLLEYGTHDKEGHFIPSYKTLT  
TRIPS\_437 NDKKTDEQNHVNEKKEGEGENNKHKKDDTIPPEKKINKENLLEYGTHDKEGHFIPSYKTLT  
TRIPS\_474 NDKKTDEQNHVNEKKEGEGENNKHKKDDTIPPEKKINKENLLEYGTHDKEGHFIPSYKTLT  
RV\_3701 NDKKTDEQNHVNEKKEGEGENNKHKKDDTIPPEKKINKENLLEYGTHDKEGHFIPSYKTLT  
PS183 NDKKTDEQNHVNEKKEGEGENNKHKKDDTIPPEKKINKENLLEYGTHDKEGHFIPSYKTLT  
RV\_3731 NDKKTDEQNHVNEKKEGEGENNKHKKDDTIPPEKKINKENLLEYGTHDKEGHFIPSYKTLT  
TRIPS\_364 NDKKTDEQNHVNEKKEGEGENNKHKKDDTIPPEKKINKENLLEYGTHDKEGHFIPSYKTLT  
BM\_0009 NDKKTDEQNHVNEKKEGEGENNKHKKDDTIPPEKKINKENLLEYGTHDKEGHFIPSYKTLT  
TRIPS\_331 NDKKTDEQNHVNEKKEGEGENNKHKKDDTIPPEKKINKENLLEYGTHDKEGHFIPSYKTLT  
RV\_3766 NDKKTDEQNHVNEKKEGEGENNKHKKDDTIPPEKKINKENLLEYGTHDKEGHFIPSYKTLT  
TRIPS\_355 NDKKTDEQNHVNEKKEGEGENNKHKKDDTIPPEKKINKENLLEYGTHDKEGHFIPSYKTLT  
TRIPS\_461 NDKKTDEQNHVNEKKEGEGENNKHKKDDTIPPEKKINKENLLEYGTHDKEGHFIPSYKTLT  
TRIPS\_501 NDKKTDEQNHVNEKKEGEGENNKHKKDDTIPPEKKINKENLLEYGTHDKEGHFIPSYKTLT  
O079-B NDKKTDEQNHVNEKKEGEGENNKHKKDDTIPPEKKINKENLLEYGTHDKEGHFIPSYKTLT  
H209 NDKKTDEQNHVNEKKEGEGENNKHKKDDTIPPEKKINKENLLEYGTHDKEGHFIPSYKTLT  
P196J3-C NDKKTDEQNHVNEKKEGEGENNKHKKDDTIPPEKKINKENLLEYGTHDKEGHFIPSYKTLT  
SenT101.09 NDKKTDEQNHVNEKKEGEGENNKHKKDDTIPPEKKINKENLLEYGTHDKEGHFIPSYKTLT  
SenT149.09 NDKKTDEQNHVNEKKEGEGENNKHKKDDTIPPEKKINKENLLEYGTHDKEGHFIPSYKTLT  
SenT180.08 NDKKTDEQNHVNEKKEGEGENNKHKKDDTIPPEKKINKENLLEYGTHDKEGHFIPSYKTLT  
SenT142.09 NDKKTDEQNHVNEKKEGEGENNKHKKDDTIPPEKKINKENLLEYGTHDKEGHFIPSYKTLT  
N011-A NDKKTDEQNHVNEKKEGEGENNKHKKDDTIPPEKKINKENLLEYGTHDKEGHFIPSYKTLT  
O306-A NDKKTDEQNHVNEKKEGEGENNKHKKDDTIPPEKKINKENLLEYGTHDKEGHFIPSYKTLT  
P241-D NDKKTDEQNHVNEKKEGEGENNKHKKDDTIPPEKKINKENLLEYGTHDKEGHFIPSYKTLT  
RV\_3635 NDKKTDEQNHVNEKKEGEGENNKHKKDDTIPPEKKINKENLLEYGTHDKEGHFIPSYKTLT  
P164-C NDKKTDEQNHVNEKKEGEGENNKHKKDDTIPPEKKINKENLLEYGTHDKEGHFIPSYKTLT  
RV\_3630 NDKKTDEQNHVNEKKEGEGENNKHKKDDTIPPEKKINKENLLEYGTHDKEGHFIPSYKTLT  
RV\_3739 NDKKTDEQNHVNEKKEGEGENNKHKKDDTIPPEKKINKENLLEYGTHDKEGHFIPSYKTLT  
RV\_3730 NDKKTDEQNHVNEKKEGEGENNKHKKDDTIPPEKKINKENLLEYGTHDKEGHFIPSYKTLT  
BM\_0008 NDKKTDEQNHVNEKKEGEGENNKHKKDDTIPPEKKINKENLLEYGTHDKEGHFIPSYKTLT  
TRIPS\_759 NDKKTDEQNHVNEKKEGEGENNKHKKDDTIPPEKKINKENLLEYGTHDKEGHFIPSYKTLT  
RV\_3735 NDKKTDEQNHVNEKKEGEGENNKHKKDDTIPPEKKINKENLLEYGTHDKEGHFIPSYKTLT  
TRIPS\_440 NDKKTDEQNHVNEKKEGEGENNKHKKDDTIPPEKKINKENLLEYGTHDKEGHFIPSYKTLT  
RV\_3721 NDKKTDEQNHVNEKKEGEGENNKHKKDDTIPPEKKINKENLLEYGTHDKEGHFIPSYKTLT  
P237-C NDKKTDEQNHVNEKKEGEGENNKHKKDDTIPPEKKINKENLLEYGTHDKEGHFIPSYKTLT  
TRIPS\_487 NDKKTDEQNHVNEKKEGEGENNKHKKDDTIPPEKKINKENLLEYGTHDKEGHFIPSYKTLT  
M113-A NDKKTDEQNHVNEKKEGEGENNKHKKDDTIPPEKKINKENLLEYGTHDKEGHFIPSYKTLT  
RV\_3714 NDKKTDEQNHVNEKKEGEGENNKHKKDDTIPPEKKINKENLLEYGTHDKEGHFIPSYKTLT  
RV\_3717 NDKKTDEQNHVNEKKEGEGENNKHKKDDTIPPEKKINKENLLEYGTHDKEGHFIPSYKTLT  
327.1 NDKKTDEQNHVNEKKEGEGENNKHKKDDTIPPEKKINKENLLEYGTHDKEGHFIPSYKTLT  
RV\_3655 NDKKTDEQNHVNEKKEGEGENNKHKKDDTIPPEKKINKENLLEYGTHDKEGHFIPSYKTLT  
\*\*\*\*\*



181

240

|            |                                                                 |
|------------|-----------------------------------------------------------------|
| 3D7        | DEILSTNNAMEKASSFLKIACSHVMKLIIEFI PESKLSSQYIKVDNKNIYLKDI AVECQNI |
| TRIPS_480  | DEILSTNNAMEKASSFLKIACSHVMKLIIEFI PESKLSSQYIKVDNKNIYLKDI AVECQNI |
| RV_3703    | DEILSTNNAMEKASSFLKISCSHVMKLIIEFI PESKLSSQYIKVDNKNIYLKDI AVECQNI |
| RV_3637    | DEILSTNNAMEKASSFLKISCSHVMKLIIEFI PESKLSSQYIKVDNKNIYLKDI AVECQNI |
| RV_3729    | DEILSTNNAMEKASSFLKIACSHVMKLIIEFI PESKLSSQYIKVDNKNIYLKDI AVECQNI |
| RV_3708    | DEILSTNNAMEKASSFLKISCSHVMKLIIEFI PESKLSSQYIKVDNKNIYLKDI AVECQNI |
| UGK_408.2  | DEILSTNNAMEKASSFLKISCSHVMKLIIEFI PESKLSSQYIKVDNKNIYLKDI AVECQNI |
| 309.1      | DEILSTNNAMEKASSFLKISCSHVMKLIIEFI PESKLSSQYIKVDNKNIYLKDI AVECQNI |
| UGK_443.2  | DEILSTNNAMEKASSFLKISCSHVMKLIIEFI PESKLSSQYIKVDNKNIYLKDI AVECQNI |
| RV_3736    | DEILSTNNAMEKASSFLKISCSHVMKLIIEFI PESKLSSQYIKVDNKNIYLKDI AVECQNI |
| PS122_G11  | DEILSTNNAMEKASSFLKISCSHVMKLIIEFI PESKLSSQYIKVDNKNIYLKDI AVECQNI |
| RV_3687    | DEILSTNNAMEKASSFLKISCSHVMKLIIEFI PESKLSSQYIKVDNKNIYLKDI AVECQNI |
| RV_3610    | DEILSTNNAMEKASSFLKISCSHVMKLIIEFI PESKLSSQYIKVDNKNIYLKDI AVECQNI |
| PS250      | DEILSTNNAMEKASSFLKISCSHVMKLIIEFI PESKLSSQYIKVDNKNIYLKDI AVECQNI |
| RV_3675    | DEILSTNNAMEKASSFLKISCSHVMKLIIEFI PESKLSSQYIKVDNKNIYLKDI AVECQNI |
| RV_3606    | DEILSTNNAMEKASSFLKISCSHVMKLIIEFI PESKLSSQYIKVDNKNIYLKDI AVECQNI |
| PS103      | DEILSTNNAMEKASSFLKISCSHVMKLIIEFI PESKLSSQYIKVDNKNIYLKDI AVECQNI |
| RV_3741    | DEILSTNNAMEKASSFLKIACSHVMKLIIEFI PESKLSSQYIKVDNKNIYLKDI AVECQNI |
| TRIPS_437  | DEILSTNNAMEKASSFLKISCSHVMKLIIEFI PESKLSSQYIKVDNKNIYLKDI AVECQNI |
| TRIPS_474  | DEILSTNNAMEKASSFLKIACSHVMKLIIEFI PESKLSSQYIKVDNKNIYLKDI AVECQNI |
| RV_3701    | DEILSTNNAMEKASSFLKIACSHVMKLIIEFI PESKLSSQYIKVDNKNIYLKDI AVECQNI |
| PS183      | DEILSTNNAMEKASSFLKIACSHVMKLIIEFI PESKLSSQYIKVDNKNIYLKDI AVECQNI |
| RV_3731    | DEILSTNNAMEKASSFLKIACSHVMKLIIEFI PESKLSSQYIKVDNKNIYLKDI AVECQNI |
| TRIPS_364  | DEILSTNNAMEKASSFLKIACSHVMKLIIEFI PESKLSSQYIKVDNKNIYLKDI AVECQNI |
| BM_0009    | DEILSTNNAMEKASSFLKIACSHVMKLIIEFI PESKLSSQYIKVDNKNIYLKDI AVECQNI |
| TRIPS_331  | DEILSTNNAMEKASSFLKIACSHVMKLIIEFI PESKLSSQYIKVDNKNIYLKDI AVECQNI |
| RV_3766    | DEILSTNNAMEKASSFLKIACSHVMKLIIEFI PESKLSSQYIKVDNKNIYLKDI AVECQNI |
| TRIPS_355  | DEILSTNNAMEKASSFLKIACSHVMKLIIEFI PESKLSSQYIKVDNKNIYLKDI AVECQNI |
| TRIPS_461  | DEILSTNNAMEKASSFLKIACSHVMKLIIEFI PESKLSSQYIKVDNKNIYLKDI AVECQNI |
| TRIPS_501  | DEILSTNNAMEKASSFLKIACSHVMKLIIEFI PESKLSSQYIKVDNKNIYLKDI AVECQNI |
| O079-B     | DEILSTNNAMEKASSFLKIACSHVMKLIIEFI PESKLSSQYIKVDNKNIYLKDI AVECQNI |
| H209       | DEILSTNNAMEKASSFLKIACSHVMKLIIEFI PESKLSSQYIKVDNKNIYLKDI AVECQNI |
| P196J3-C   | DEILSTNNAMEKASSFLKIACSHVMKLIIEFI PESKLSSQYIKVDNKNIYLKDI AVECQNI |
| SenT101.09 | DEILSTNNAMEKASSFLKISCSHVMKLIIEFI PESKLSSQYIKVDNKNIYLKDI AVECQNI |
| SenT149.09 | DEILSTNNAMEKASSFLKIACSHVMKLIIEFI PESKLSSQYIKVDNKNIYLKDI AVECQNI |
| SenT180.08 | DEILSTNNAMEKASSFLKIACSHVMKLIIEFI PESKLSSQYIKVDNKNIYLKDI AVECQNI |
| SenT142.09 | DEILSTNNAMEKASSFLKIACSHVMKLIIEFI PESKLSSQYIKVDNKNIYLKDI AVECQNI |
| N011-A     | DEILSTNNAMEKASSFLKIACSHVMKLIIEFI PESKLSSQYIKVDNKNIYLKDI AVECQNI |
| O306-A     | DEILSTNNAMEKASSFLKIACSHVMKLIIEFI PESKLSSQYIKVDNKNIYLKDI AVECQNI |
| P241-D     | DEILSTNNAMEKASSFLKIACSHVMKLIIEFI PESKLSSQYIKVDNKNIYLKDI AVECQNI |
| RV_3635    | DEILSTNNAMEKASSFLKISCSHVMKLIIEFI PESKLSSQYIKVDNKNIYLKDI AVECQNI |
| P164-C     | DEILSTNNAMEKASSFLKIACSHVMKLIIEFI PESKLSSQYIKVDNKNIYLKDI AVECQNI |
| RV_3630    | DEILSTNNAMEKASSFLKIACSHVMKLIIEFI PESKLSSQYIKVDNKNIYLKDI AVECQNI |
| RV_3739    | DEILSTNNAMEKASSFLKIACSHVMKLIIEFI PESKLSSQYIKVDNKNIYLKDI AVECQNI |
| RV_3730    | DEILSTNNAMEKASSFLKIACSHVMKLIIEFI PESKLSSQYIKVDNKNIYLKDI AVECQNI |
| BM_0008    | DEILSTNNAMEKASSFLKIACSHVMKLIIEFI PESKLSSQYIKVDNKNIYLKDI AVECQNI |
| TRIPS_759  | DEILSTNNAMEKASSFLKIACSHVMKLIIEFI PESKLSSQYIKVDNKNIYLKDI AVECQNI |
| RV_3735    | DEILSTNNAMEKASSFLKIACSHVMKLIIEFI PESKLSSQYIKVDNKNIYLKDI AVECQNI |
| TRIPS_440  | DEILSTNNAMEKASSFLKIACSHVMKLIIEFI PESKLSSQYIKVDNKNIYLKDI AVECQNI |
| RV_3721    | DEILSTNNAMEKASSFLKIACSHVMKLIIEFI PESKLSSQYIKVDNKNIYLKDI AVECQNI |
| P237-C     | DEILSTNNAMEKASSFLKIACSHVMKLIIEFI PESKLSSQYIKVDNKNIYLKDI AVECQNI |
| TRIPS_487  | DEILSTNNAMEKASSFLKIACSHVMKLIIEFI PESKLSSQYIKVDNKNIYLKDI AVECQNI |
| M113-A     | DEILSTNNAMEKASSFLKIACSHVMKLIIEFI PESKLSSQYIKVDNKNIYLKDI AVECQNI |
| RV_3714    | DEILSTNNAMEKASSFLKIACSHVMKLIIEFI PESKLSSQYIKVDNKNIYLKDI AVECQNI |
| RV_3717    | DEILSTNNAMEKASSFLKISCSHVMKLIIEFI PESKLSSQYIKVDNKNIYLKDI AVECQNI |
| 327.1      | DEILSTNNAMEKASSFLKISCSHVMKLIIEFI PESKLSSQYIKVDNKNIYLKDI AVECQNI |
| RV_3655    | DEILSTNNAMEKASSFLKISCSHVMKLIIEFI PESKLSSQYIKVDNKNIYLKDI AVECQNI |
|            | *****                                                           |

|            |                             |     |
|------------|-----------------------------|-----|
|            | 241                         | 267 |
| 3D7        | YFNLEKFSMTLIVFNSKINKFIYSQEK |     |
| TRIPS_480  | YFNLEKFSMTLIVFNSKINKFIYSQEK |     |
| RV_3703    | YFNLEKFSMTLIVFNSKINKFIYSQEK |     |
| RV_3637    | YFNLEKFSMTLIVFNSKINKFIYSQEK |     |
| RV_3729    | YFNLEKFSMTLIVFNSKINKFIYSQEK |     |
| RV_3708    | YFNLEKFSMTLIVFNSKINKFIYSQEK |     |
| UGK_408.2  | YFNLEKFSMTLIVFNSKINKFIYSQEK |     |
| 309.1      | YFNLEKFSMTLIVFNSKINKFIYSQEK |     |
| UGK_443.2  | YFNLEKFSMTLIVFNSKINKFIYSQEK |     |
| RV_3736    | YFNLEKFSMTLIVFNSKINKFIYSQEK |     |
| PS122_G11  | YFNLEKFSMTLIVFNSKINKFIYSQEK |     |
| RV_3687    | YFNLEKFSMTLIVFNSKINKFIYSQEK |     |
| RV_3610    | YFNLEKFSMTLIVFNSKINKFIYSQEK |     |
| PS250      | YFNLEKFSMTLIVFNSKINKFIYSQEK |     |
| RV_3675    | YFNLEKFSMTLIVFNSKINKFIYSQEK |     |
| RV_3606    | YFNLEKFSMTLIVFNSKINKFIYSQEK |     |
| PS103      | YFNLEKFSMTLIVFNSKINKFIYSQEK |     |
| RV_3741    | YFNLEKFSMTLIVFNSKINKFIYSQEK |     |
| TRIPS_437  | YFNLEKFSMTLIVFNSKINKFIYSQEK |     |
| TRIPS_474  | YFNLEKFSMTLIVFNSKINKFIYSQEK |     |
| RV_3701    | YFNLEKFSMTLIVFNSKINKFIYSQEK |     |
| PS183      | YFNLEKFSMTLIVFNSKINKFIYSQEK |     |
| RV_3731    | YFNLEKFSMTLIVFNSKINKFIYSQEK |     |
| TRIPS_364  | YFNLEKFSMTLIVFNSKINKFIYSQEK |     |
| BM_0009    | YFNLEKFSMTLIVFNSKINKFIYSQEK |     |
| TRIPS_331  | YFNLEKFSMTLIVFNSKINKFIYSQEK |     |
| RV_3766    | YFNLEKFSMTLIVFNSKINKFIYSQEK |     |
| TRIPS_355  | YFNLEKFSMTLIVFNSKINKFIYSQEK |     |
| TRIPS_461  | YFNLEKFSMTLIVFNSKINKFIYSQEK |     |
| TRIPS_501  | YFNLEKFSMTLIVFNSKINKFIYSQEK |     |
| O079-B     | YFNLEKFSMTLIVFNSKINKFIYSQEK |     |
| H209       | YFNLEKFSMTLIVFNSKINKFIYSQEK |     |
| P196J3-C   | YFNLEKFSMTLIVFNSKINKFIYSQEK |     |
| SenT101.09 | YFNLEKFSMTLIVFNSKINKFIYSQEK |     |
| SenT149.09 | YFNLEKFSMTLIVFNSKINKFIYSQEK |     |
| SenT180.08 | YFNLEKFSMTLIVFNSKINKFIYSQEK |     |
| SenT142.09 | YFNLEKFSMTLIVFNSKINKFIYSQEK |     |
| N011-A     | YFNLEKFSMTLIVFNSKINKFIYSQEK |     |
| O306-A     | YFNLEKFSMTLIVFNSKINKFIYSQEK |     |
| P241-D     | YFNLEKFSMTLIVFNSKINKFIYSQEK |     |
| RV_3635    | YFNLEKFSMTLIVFNSKINKFIYSQEK |     |
| P164-C     | YFNLEKFSMTLIVFNSKINKFIYSQEK |     |
| RV_3630    | YFNLEKFSMTLIVFNSKINKFIYSQEK |     |
| RV_3739    | YFNLEKFSMTLIVFNSKINKFIYSQEK |     |
| RV_3730    | YFNLEKFSMTLIVFNSKINKFIYSQEK |     |
| BM_0008    | YFNLEKFSMTLIVFNSKINKFIYSQEK |     |
| TRIPS_759  | YFNLEKFSMTLIVFNSKINKFIYSQEK |     |
| RV_3735    | YFNLEKFSMTLIVFNSKINKFIYSQEK |     |
| TRIPS_440  | YFNLEKFSMTLIVFNSKINKFIYSQEK |     |
| RV_3721    | YFNLEKFSMTLIVFNSKINKFIYSQEK |     |
| P237-C     | YFNLEKFSMTLIVFNSKINKFIYSQEK |     |
| TRIPS_487  | YFNLEKFSMTLIVFNSKINKFIYSQEK |     |
| M113-A     | YFNLEKFSMTLIVFNSKINKFIYSQEK |     |
| RV_3714    | YFNLEKFSMTLIVFNSKINKFIYSQEK |     |
| RV_3717    | YFNLEKFSMTLIVFNSKINKFIYSQEK |     |
| 327.1      | YFNLEKFSMTLIVFNSKINKFIYSQEK |     |
| RV_3655    | YFNLEKFSMTLIVFNSKINKFIYSQEK |     |
|            | *****                       |     |

**Supplementary Figure S3:** Measurement of the antibody responses (end point titers) against rPfRA. Immunogenicity of rPfRA in (A) mice and (B) rabbit was analyzed by ELISA. Sera were serially diluted and assessed for end point titers. Pre-immune sera were taken as controls. High titer antibodies (end point observed at dilution of 1:320, 000 in mice and 1:640, 000 in rabbit) against the recombinant PfRA protein were detected. The error bars represent the standard error of the mean.

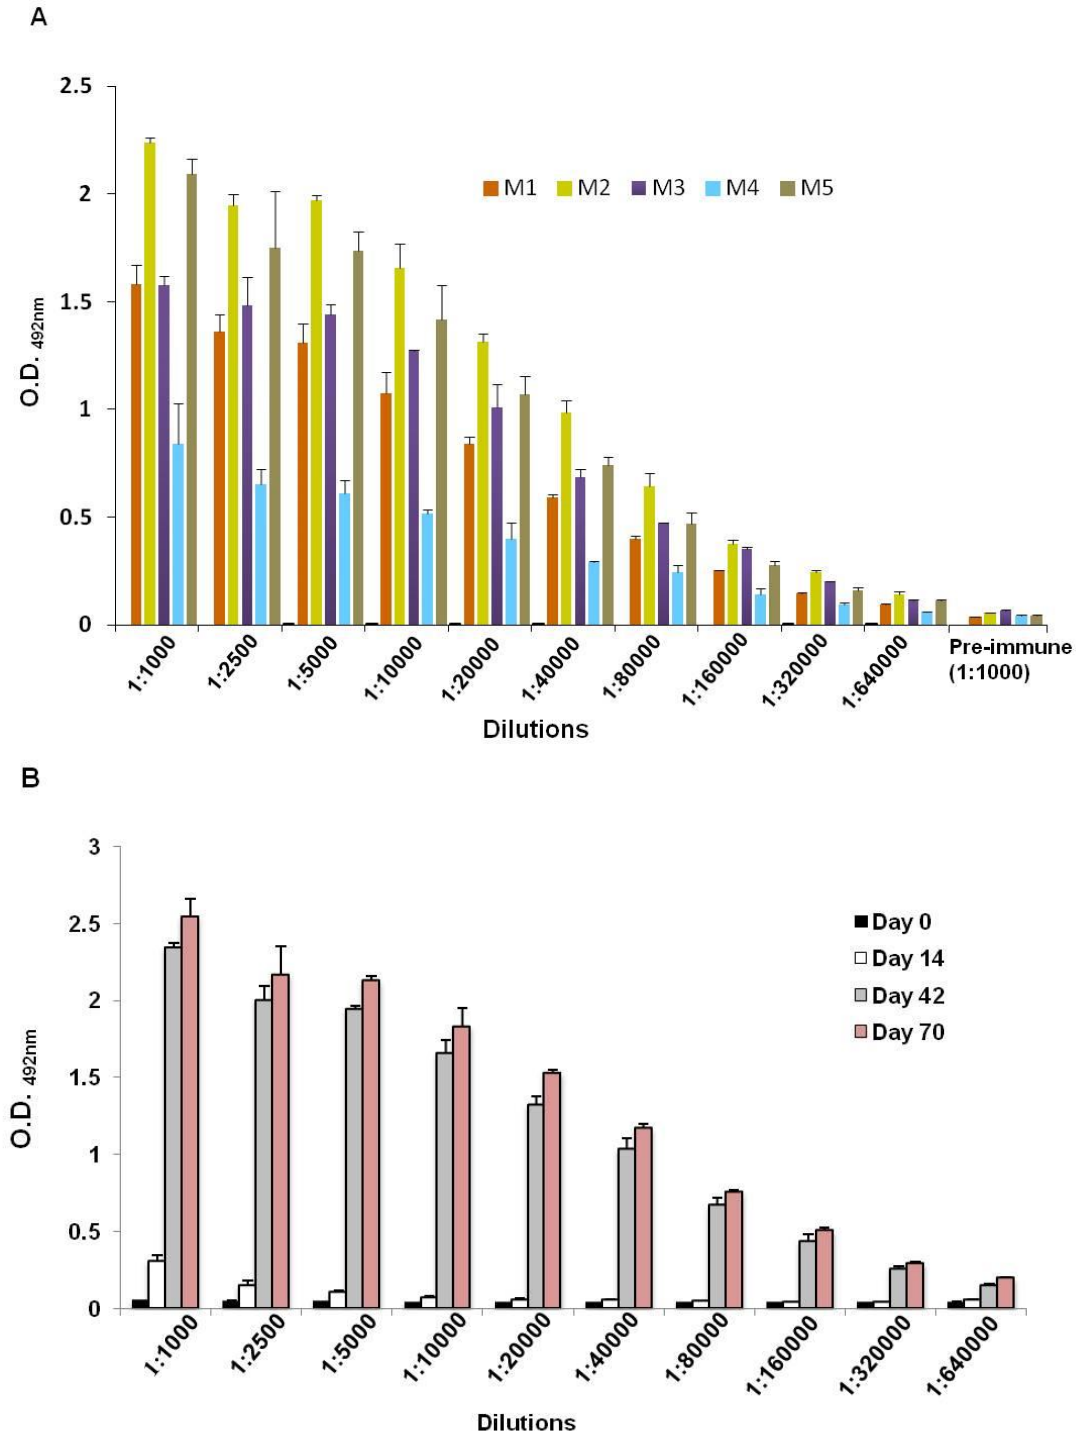

**Supplementary Figure S4:** Immunoblot analysis of rPfRA with immune sera raised in mice and rabbit. I: immune sera; PI: pre-immune sera.

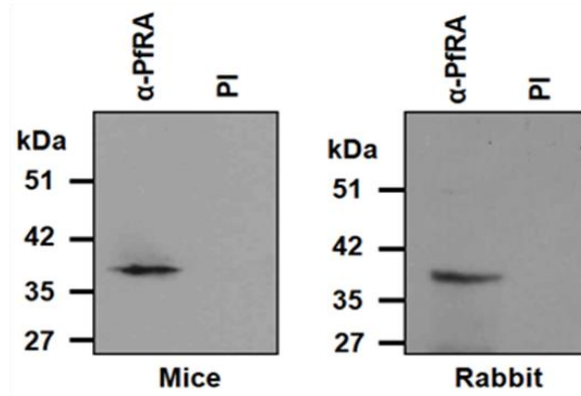

**Supplementary Figure S5:** Binding of (A) native PfRA and (B) rPfRA to untreated (U), neuraminidase-treated (N), trypsin-treated (T) and chymotrypsin-treated (C) human erythrocytes was detected by flow cytometry using anti-PfRA rabbit sera. Pre-immune rabbit sera (PI) was used as a control.

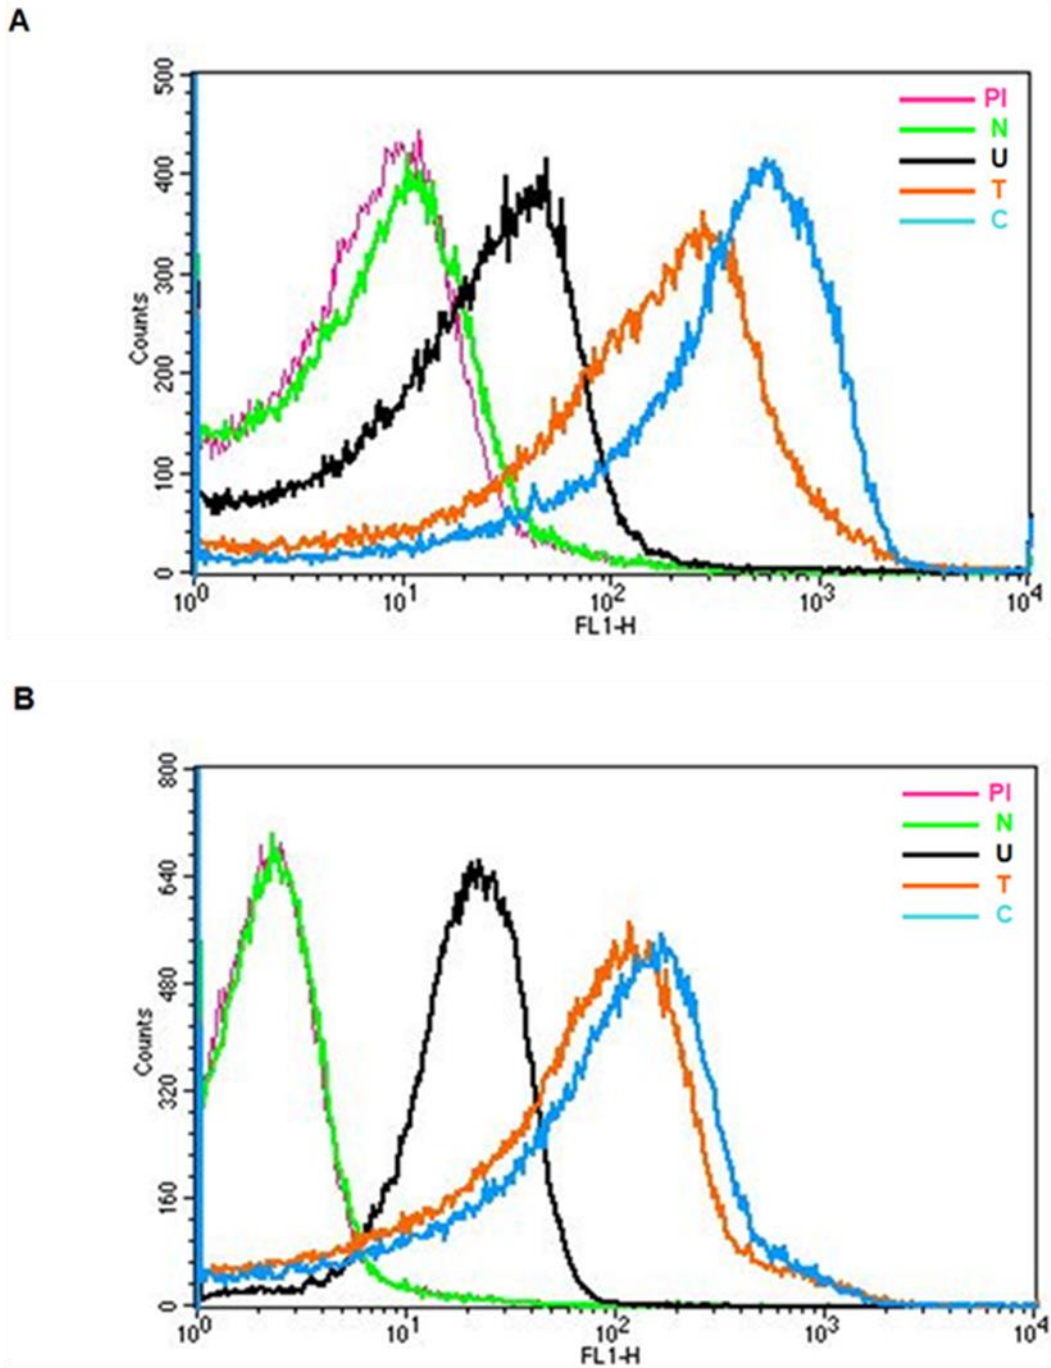

**Supplementary Figure S6:** Invasion phenotype of three freshly cultured *P. falciparum* field isolates from Manhica, Mozambique in neuraminidase-treated erythrocytes.

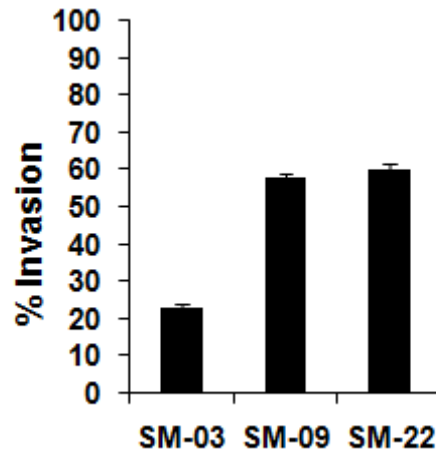

**Supplementary Table S1:** Geographical origin of *P. falciparum* laboratory clones (www.plasmodb.org).

| <b>No.</b> | <b><i>P. falciparum</i> laboratory clone</b> | <b>Geographical location</b> |
|------------|----------------------------------------------|------------------------------|
| 1.         | 3D7                                          | Africa                       |
| 2.         | Dd2-1                                        | Laos, Indochina              |
| 3.         | T9_94                                        | Thailand                     |
| 4.         | Dd2-2                                        | Laos, Indochina              |
| 5.         | 7G8                                          | Brazil                       |
| 6.         | IT                                           | Brazil                       |
| 7.         | 707A                                         | Unknown                      |
| 8.         | HB3                                          | Honduras                     |
| 9.         | CS2                                          | Brazil                       |

**Supplementary Table S2:** Geographical origin of *P. falciparum* field isolates  
(www.plasmodb.org).

| No. | <i>P. falciparum</i> field isolate | Geographical location   |
|-----|------------------------------------|-------------------------|
| 1.  | TRIPS_480                          | Gambia                  |
| 2.  | RV_3703                            | Gambia                  |
| 3.  | RV_3637                            | Gambia                  |
| 4.  | RV_3729                            | Gambia                  |
| 5.  | RV_3708                            | Gambia                  |
| 6.  | UGK_408.2                          | Uganda, Kampala         |
| 7.  | 309.1                              | Mali                    |
| 8.  | UGK_443.2                          | Uganda, Kampala         |
| 9.  | RV_3736                            | Gambia                  |
| 10. | PS122_G11                          | Mali, Bandiagara        |
| 11. | RV_3687                            | Gambia                  |
| 12. | RV_3610                            | Gambia                  |
| 13. | PS250                              | Mali, Bandiagara        |
| 14. | RV_3675                            | Gambia                  |
| 15. | RV_3606                            | Gambia                  |
| 16. | PS103                              | Mali, Bandiagara        |
| 17. | RV_3741                            | Gambia                  |
| 18. | TRIPS_437                          | Gambia                  |
| 19. | TRIPS_474                          | Gambia                  |
| 20. | RV_3701                            | Gambia                  |
| 21. | PS183                              | Mali, Bandiagara        |
| 22. | RV_3731                            | Gambia                  |
| 23. | TRIPS_364                          | Gambia                  |
| 24. | BM_0009                            | Gambia                  |
| 25. | TRIPS_331                          | Gambia                  |
| 26. | RV_3766                            | Gambia                  |
| 27. | TRIPS_355                          | Gambia                  |
| 28. | TRIPS_461                          | Gambia                  |
| 29. | TRIPS_501                          | Gambia                  |
| 30. | O079-B                             | French Guiana, Cayenne  |
| 31. | H209                               | French Guiana           |
| 32. | P196J3-C                           | Saint-Laurent du Maroni |
| 33. | SenT101.09                         | Senegal, Thies          |
| 34. | SenT149.09                         | Senegal, Thies          |
| 35. | SenT180.08                         | Senegal, Thies          |
| 36. | SenT142.09                         | Senegal, Thies          |
| 37. | N011-A                             | French Guiana, Saul     |
| 38. | O306-A                             | French Guiana, Cayenne  |
| 40. | RV_3635                            | Gambia                  |
| 41. | P164-C                             | French Guiana, Cayenne  |



| No. | <i>P. falciparum</i> field isolate | Geographical location      |
|-----|------------------------------------|----------------------------|
| 42. | RV_3630                            | Gambia                     |
| 43. | RV_3739                            | Gambia                     |
| 44. | RV_3730                            | Gambia                     |
| 45. | BM_0008                            | Gambia                     |
| 46. | TRIPS_759                          | Gambia                     |
| 47. | RV_3735                            | Gambia                     |
| 49. | TRIPS_440                          | Gambia                     |
| 50. | RV_3721                            | Gambia                     |
| 51. | P237-C                             | French Guiana, Cayenne     |
| 52. | TRIPS_487                          | Gambia                     |
| 53. | M113-A                             | Saint Georges de l'Oyapock |
| 54. | RV_3714                            | Gambia                     |
| 55. | RV_3717                            | Gambia                     |
| 56. | 327.1                              | Mali                       |
| 57. | RV_3655                            | Gambia                     |

**Supplementary Table S3:** List of Unique Peptides generated from the Mass Spectrometric analysis (LC-MS) of the trypsin digested recombinant PfRA protein.

| Accession | Description                                                                                                          | Score                       | Coverage |
|-----------|----------------------------------------------------------------------------------------------------------------------|-----------------------------|----------|
| Q8IJS3    | Conserved Plasmodium protein<br>OS=Plasmodium falciparum<br>(isolate 3D7) GN=PF10_0119<br>PE=4 SV=1 - [Q8IJS3_PLAF7] | 1226.62                     | 79.03    |
|           | A2                                                                                                                   | Sequence of Unique Peptides | # PSMs   |
|           | High                                                                                                                 | INKENLLEYGTHDKEGHFIPSYK     | 50       |
|           | High                                                                                                                 | ENEEENKENKENNQNVNK          | 4        |
|           | High                                                                                                                 | ENLLEYGTHDKEGHFIPSYK        | 31       |
|           | High                                                                                                                 | KQEEVINNNNNNVENKK           | 5        |
|           | High                                                                                                                 | EYSFLMLGKENEENK             | 8        |
|           | High                                                                                                                 | EYSFLmLGKENEENK             | 16       |
|           | High                                                                                                                 | IAcSHVmKLIEFIPESK           | 2        |
|           | High                                                                                                                 | LIEFIPESKLSSQYIK            | 5        |
|           | High                                                                                                                 | KINKENLLEYGTHDK             | 11       |
|           | High                                                                                                                 | KQEEVINNNNNNVENK            | 6        |
|           | High                                                                                                                 | EYSFLMLGKENEENK             | 3        |
|           | High                                                                                                                 | QEEVINNNNNNVENK             | 2        |
|           | High                                                                                                                 | KDDTIPPEKK                  | 18       |
|           | High                                                                                                                 | INKENLLEYGTHDK              | 12       |
|           | High                                                                                                                 | DIAVEcQNIYFNLEK             | 26       |
|           | High                                                                                                                 | TLTDEILSTNNAMEK             | 25       |
|           | High                                                                                                                 | EYSFLmLGKENEENK             | 11       |
|           | High                                                                                                                 | KNEEQNHNEK                  | 18       |
|           | High                                                                                                                 | KTDEQNHVNEK                 | 5        |
|           | High                                                                                                                 | TDEQNHVNEK                  | 12       |
|           | High                                                                                                                 | TLTDEILSTNNAmEK             | 60       |
|           | High                                                                                                                 | VDNKNIYK                    | 3        |
|           | High                                                                                                                 | KKEYSFLmLGK                 | 8        |
|           | High                                                                                                                 | ENLLEYGTHDK                 | 16       |
|           | High                                                                                                                 | KTDEQNHVNEKK                | 1        |
|           | High                                                                                                                 | HITNDEEKKK                  | 14       |

**Supplementary Table S4:** Mass spectrometric identification of native PfRA from immunoprecipitation elutes using specific antibodies.

| Accession     | Description                                                                                                                                                                                             | Score | Coverage | Unique Peptides |
|---------------|---------------------------------------------------------------------------------------------------------------------------------------------------------------------------------------------------------|-------|----------|-----------------|
| PF3D7_1012200 | Organism = Plasmodium_falciparum_3D7   product = conserved Plasmodium protein, unknown function   location = Pf3D7_10_v3:470979 - 471933(+)   length=267   sequence_SO = chromosome   SO=protein_coding | 44.32 | 22.85    | TLTDEILSTnNAMEK |
|               |                                                                                                                                                                                                         |       |          | TLTDEILSTNNAMEK |
|               |                                                                                                                                                                                                         |       |          | DIAVECQNIYFNLEK |
|               |                                                                                                                                                                                                         |       |          | TLTDEILSTNNAmEK |
|               |                                                                                                                                                                                                         |       |          | DIAVEcQNIYFNLEK |
|               |                                                                                                                                                                                                         |       |          | FSMTLIVFNSK     |
|               |                                                                                                                                                                                                         |       |          | LIEFIPESK       |
|               |                                                                                                                                                                                                         |       |          | HKKDDTIPPEK     |
|               |                                                                                                                                                                                                         |       |          | FSMTLIVFnSK     |

**PfRA protein sequence:** Unique peptides detected by LC-MS highlighted in green

← Signal Sequence (1-22) →  
 MKRFFVLFVIFLVHIWSENVDTFKCNYSK KKKKNGHHIKRHITNDEEKKKEYSFLMLGKE  
 NEEENKKNQNVNKDNNNDNNNNEKKNEEQNHNNNEKKQEEVINNNNNNVENKKE  
 EENHNNDKKDEQNHVNEKKQEGENNKHKKDDTIPPEK KINKENLLEYGTHDKEGHFIP  
 SYKTLTDEILSTNNAMEKASSFLKIACSHVMKLIEFIPESKLSSQYIKVDNKNIYLKDIAVE  
 CQNIYFNLEKFSMTLIVFNSKINKFIYSQEK
